# Supplementary material
Source: MDPI journal article supplement (https://www.mdpi.com/2073-4441/14/13/2081)
Supplement: s1 [file s1]

Table S1. SERLAB and Sentinel-1 databases of rainfall, runoff and antecedent soil moisture observations

| Period                  | N.  | Event Date |            | P<br>(mm) | Q<br>(mm) | Date of<br>Satellite<br>Acquisition | SSM(t)<br>(%) | ADSI<br>(mm) | ADSI+P<br>(mm) | Q <sub>R</sub> | W<br>$\left(\frac{mm}{h}\right)$ | I <sub>M</sub><br>$\left(\frac{mm}{h}\right)$ | I <sub>30</sub><br>$\left(\frac{mm}{h}\right)$ | R <sub>e</sub><br>$\left(\frac{MJ\ mm}{ha\ h}\right)$ | A <sub>e</sub><br>$\left(\frac{t}{ha}\right)$ | Q <sub>R</sub> R <sub>e</sub><br>$\left(\frac{MJ\ mm}{ha\ h}\right)$ | A <sub>e,N</sub><br>$\left(\frac{Mg}{ha}\right)$ |
|-------------------------|-----|------------|------------|-----------|-----------|-------------------------------------|---------------|--------------|----------------|----------------|----------------------------------|-----------------------------------------------|------------------------------------------------|-------------------------------------------------------|-----------------------------------------------|----------------------------------------------------------------------|--------------------------------------------------|
|                         |     | Start Date | End Date   |           |           |                                     |               |              |                |                |                                  |                                               |                                                |                                                       |                                               |                                                                      |                                                  |
| Summer<br>and<br>Spring | 1   | 25/03/2015 | 26/03/2015 | 57.20     | 9.47      | 24/03/2015                          | 53.00         | 26.50        | 83.70          | 0.17           | 14.67                            | 3.90                                          | 10.80                                          | 78.99                                                 | 0.23                                          | 13.08                                                                | 0.11                                             |
|                         | 2   | 22/05/2015 | 23/05/2015 | 37.00     | 0.34      | 17/05/2015                          | 49.50         | 24.75        | 61.75          | 0.01           | 12.25                            | 3.02                                          | 4.40                                           | 18.49                                                 | **                                            | 0.17                                                                 | **                                               |
|                         | 3   | 14/06/2015 | 14/06/2015 | 6.40      | 0.00      | 10/06/2015                          | 61.00         | 30.50        | 36.90          | 0.00           | 0.50                             | 12.80                                         | 12.40                                          | 16.90                                                 | 0.00                                          | 0.00                                                                 | 0.00                                             |
|                         | 4   | 09/08/2015 | 10/08/2015 | 56.60     | 9.33      | 08/08/2015                          | 54.50         | 27.25        | 83.85          | 0.16           | 7.75                             | 7.30                                          | 28.40                                          | 298.26                                                | 5.60                                          | 49.15                                                                | 2.79                                             |
|                         | 5   | 10/08/2015 | 10/08/2015 | 5.20      | 0.00      | 09/08/2015                          | 100.00        | 50.00        | 55.20          | 0.00           | 1.50                             | 3.47                                          | 4.00                                           | 2.48                                                  | 0.00                                          | 0.00                                                                 | 0.00                                             |
|                         | 6   | 16/08/2015 | 16/08/2015 | 8.20      | 0.00      | 15/08/2015                          | 71.00         | 35.50        | 43.70          | 0.00           | 2.17                             | 3.78                                          | 5.20                                           | 5.65                                                  | 0.00                                          | 0.00                                                                 | 0.00                                             |
|                         | 7   | 24/08/2015 | 24/08/2015 | 5.80      | 0.00      | 21/08/2015                          | 64.00         | 32.00        | 37.80          | 0.00           | 1.25                             | 4.64                                          | 7.60                                           | 6.34                                                  | 0.00                                          | 0.00                                                                 | 0.00                                             |
|                         | 8   | 24/08/2015 | 24/08/2015 | 9.60      | 0.00      | 21/08/2015                          | 64.00         | 32.00        | 41.60          | 0.00           | 1.33                             | 7.20                                          | 6.40                                           | 11.54                                                 | 0.00                                          | 0.00                                                                 | 0.00                                             |
|                         | 9   | 23/03/2016 | 23/03/2016 | 8.00      | 0.00      | 18/03/2016                          | 24.50         | 12.25        | 20.25          | 0.00           | 3.17                             | 2.53                                          | 3.20                                           | 2.76                                                  | 0.00                                          | 0.00                                                                 | 0.00                                             |
|                         | 10  | 23/04/2016 | 25/04/2016 | 65.80     | 0.94      | 17/04/2016                          | 8.00          | 4.00         | 69.80          | 0.01           | 14.58                            | 4.51                                          | 16.80                                          | 159.97                                                | 0.07                                          | 2.28                                                                 | 0.03                                             |
|                         | 11  | 12/05/2016 | 12/05/2016 | 8.40      | 0.00      | 11/05/2016                          | 23.50         | 11.75        | 20.15          | 0.00           | 1.50                             | 5.60                                          | 11.20                                          | 16.00                                                 | 0.00                                          | 0.00                                                                 | 0.00                                             |
|                         | 12  | 19/05/2016 | 24/05/2016 | 42.80     | 5.30      | 17/05/2016                          | 57.00         | 28.50        | 71.30          | 0.12           | 5.42                             | 7.90                                          | 23.60                                          | 158.16                                                | 6.05                                          | 19.58                                                                | 3.01                                             |
|                         | 13  | 30/05/2016 | 30/05/2016 | 7.80      | 0.00      | 29/05/2016                          | 54.50         | 27.25        | 35.05          | 0.00           | 1.08                             | 7.20                                          | 9.60                                           | 12.96                                                 | 0.00                                          | 0.00                                                                 | 0.00                                             |
|                         | 14  | 24/07/2016 | 25/07/2016 | 31.20     | 0.93      | 21/07/2016                          | 64.00         | 32.00        | 63.20          | 0.03           | 3.75                             | 8.32                                          | 25.60                                          | 127.62                                                | 0.34                                          | 3.81                                                                 | 0.17                                             |
|                         | 15  | 14/09/2016 | 18/09/2016 | 50.80     | 0.87      | 08/09/2016                          | 42.50         | 21.25        | 72.05          | 0.02           | 9.33                             | 5.44                                          | 11.20                                          | 75.04                                                 | 0.14                                          | 1.29                                                                 | 0.07                                             |
|                         | 16  | 14/09/2016 | 14/09/2016 | 6.60      | 0.00      | 08/09/2016                          | 42.50         | 21.25        | 27.85          | 0.00           | 0.67                             | 9.90                                          | 11.20                                          | 12.91                                                 | 0.00                                          | 0.00                                                                 | 0.00                                             |
|                         | 17  | 18/04/2017 | 18/04/2017 | 6.20      | 0.00      | 17/04/2017                          | 34.00         | 17.00        | 23.20          | 0.00           | 1.58                             | 3.92                                          | 7.20                                           | 6.27                                                  | 0.00                                          | 0.00                                                                 | 0.00                                             |
|                         | 18  | 30/06/2017 | 30/06/2017 | 7.60      | 0.00      | 29/06/2017                          | 4.50          | 2.25         | 9.85           | 0.00           | 3.17                             | 2.40                                          | 2.00                                           | 1.59                                                  | 0.00                                          | 0.00                                                                 | 0.00                                             |
|                         | 19* | 24/07/2017 | 25/07/2017 | 38.00     | 9.34      | 23/07/2017                          | 1.00          | 0.50         | 38.50          | 0.25           | 2.17                             | 17.54                                         | 44.00                                          | 341.81                                                | 17.76                                         | 84.02                                                                | 8.84                                             |
|                         | 20  | 04/04/2018 | 05/04/2018 | 18.80     | 0.36      | 01/04/2018                          | 40.00         | 20.00        | 38.80          | 0.02           | 3.08                             | 6.10                                          | 17.20                                          | 52.18                                                 | 0.04                                          | 1.00                                                                 | 0.02                                             |
|                         | 21  | 03/05/2018 | 06/05/2018 | 28.20     | 0.25      | 01/05/2018                          | 21.00         | 10.50        | 38.70          | 0.01           | 6.25                             | 4.51                                          | 13.60                                          | 48.79                                                 | 0.03                                          | 0.44                                                                 | 0.01                                             |
|                         | 22  | 09/05/2018 | 16/05/2018 | 57.40     | 0.50      | 06/05/2018                          | 76.00         | 38.00        | 95.40          | 0.01           | 12.33                            | 4.65                                          | 18.80                                          | 106.88                                                | 0.04                                          | 0.93                                                                 | 0.02                                             |
|                         | 23  | 08/06/2018 | 08/06/2018 | 20.40     | 0.32      | 06/06/2018                          | 56.50         | 28.25        | 48.65          | 0.02           | 2.67                             | 7.65                                          | 22.00                                          | 83.38                                                 | 0.13                                          | 1.29                                                                 | 0.07                                             |
|                         | 24* | 12/06/2018 | 13/06/2018 | 44.60     | 13.90     | 11/06/2018                          | 66.50         | 33.25        | 77.85          | 0.31           | 3.17                             | 14.08                                         | 44.40                                          | 441.43                                                | 17.42                                         | 137.57                                                               | 8.67                                             |
|                         | 25* | 28/07/2019 | 28/07/2019 | 57.80     | 15.45     | 19/07/2019                          | 38.50         | 19.25        | 77.05          | 0.27           | 3.16                             | 18.29                                         | 54                                             | 762.6                                                 | **                                            | 203.84                                                               | **                                               |
| Winter<br>and<br>Autumn | 26  | 30/01/2015 | 07/02/2015 | 87.40     | 8.85      | 29/01/2015                          | 34.00         | 17.00        | 104.40         | 0.10           | 28.75                            | 3.04                                          | 10.40                                          | 73.46                                                 | 0.16                                          | 7.44                                                                 | 0.08                                             |
|                         | 27  | 21/02/2015 | 22/02/2015 | 6.40      | 0.00      | 16/02/2015                          | 56.50         | 28.25        | 34.65          | 0.00           | 2.58                             | 2.48                                          | 2.00                                           | 1.40                                                  | 0.00                                          | 0.00                                                                 | 0.00                                             |
|                         | 28  | 04/03/2015 | 05/03/2015 | 26.20     | 0.29      | 28/02/2015                          | 22.50         | 11.25        | 37.45          | 0.01           | 5.92                             | 4.43                                          | 18.80                                          | 71.20                                                 | 0.02                                          | 0.78                                                                 | 0.01                                             |
|                         | 29  | 15/03/2015 | 17/03/2015 | 45.00     | 0.66      | 12/03/2015                          | 33.50         | 16.75        | 61.75          | 0.01           | 17.17                            | 2.62                                          | 7.00                                           | 23.47                                                 | 0.02                                          | 0.35                                                                 | 0.01                                             |
|                         | 30  | 24/09/2015 | 24/09/2015 | 5.60      | 0.00      | 20/09/2015                          | 47.50         | 23.75        | 29.35          | 0.00           | 2.17                             | 2.58                                          | 2.80                                           | 1.69                                                  | 0.00                                          | 0.00                                                                 | 0.00                                             |
|                         | 31  | 01/10/2015 | 01/10/2015 | 9.20      | 0.00      | 26/09/2015                          | 53.50         | 26.75        | 35.95          | 0.00           | 3.67                             | 2.51                                          | 2.00                                           | 1.96                                                  | 0.00                                          | 0.00                                                                 | 0.00                                             |

|                   |            |            |       |       |            |        |       |        |      |       |       |       |        |       |        |      |
|-------------------|------------|------------|-------|-------|------------|--------|-------|--------|------|-------|-------|-------|--------|-------|--------|------|
| 32                | 03/10/2015 | 07/10/2015 | 36.40 | 0.37  | 02/10/2015 | 98.50  | 49.25 | 85.65  | 0.01 | 4.00  | 9.10  | 34.40 | 236.80 | 0.08  | 2.43   | 0.04 |
| 33                | 21/11/2015 | 23/11/2015 | 42.60 | 0.34  | 19/11/2015 | 59.00  | 29.50 | 72.10  | 0.01 | 7.42  | 5.74  | 20.40 | 121.28 | 0.02  | 0.97   | 0.01 |
| 34                | 02/01/2016 | 12/01/2016 | 57.00 | 0.82  | 30/12/2015 | 79.00  | 39.50 | 96.50  | 0.01 | 8.67  | 6.58  | 24.40 | 158.26 | 0.10  | 2.27   | 0.05 |
| 35                | 13/02/2016 | 18/02/2016 | 31.40 | 0.44  | 11/02/2016 | 70.50  | 35.25 | 66.65  | 0.01 | 7.58  | 4.14  | 8.00  | 16.55  | 0.03  | 0.23   | 0.01 |
| 36                | 26/02/2016 | 29/02/2016 | 50.20 | 0.98  | 23/02/2016 | 49.50  | 24.75 | 74.95  | 0.02 | 11.42 | 4.40  | 9.60  | 56.27  | 0.02  | 1.10   | 0.01 |
| 37                | 05/03/2016 | 11/03/2016 | 34.00 | 0.89  | 29/02/2016 | 73.50  | 36.75 | 70.75  | 0.03 | 9.58  | 3.55  | 10.40 | 28.15  | 0.12  | 0.74   | 0.06 |
| 38                | 25/11/2016 | 25/11/2016 | 7.80  | 0.00  | 24/11/2016 | 89.50  | 44.75 | 52.55  | 0.00 | 3.25  | 2.40  | 2.00  | 1.64   | 0.00  | 0.00   | 0.00 |
| 39                | 05/02/2017 | 06/02/2017 | 26.80 | 0.30  | 02/04/2017 | 25.00  | 12.50 | 39.30  | 0.01 | 7.17  | 3.74  | 8.80  | 31.60  | 0.02  | 0.35   | 0.01 |
| 40                | 18/02/2017 | 18/02/2017 | 6.60  | 0.00  | 17/02/2017 | 30.50  | 15.25 | 21.85  | 0.00 | 1.50  | 4.40  | 8.00  | 7.80   | 0.00  | 0.00   | 0.00 |
| 41                | 24/02/2017 | 25/02/2017 | 9.00  | 0.00  | 23/02/2017 | 14.50  | 7.25  | 16.25  | 0.00 | 2.42  | 3.72  | 6.00  | 6.63   | 0.00  | 0.00   | 0.00 |
| 42                | 14/03/2017 | 14/03/2017 | 5.80  | 0.00  | 13/03/2017 | 15.00  | 7.50  | 13.30  | 0.00 | 0.17  | 34.73 | 11.60 | 17.53  | 0.00  | 0.00   | 0.00 |
| 43                | 27/10/2018 | 30/10/2018 | 51.80 | 1.24  | 27/10/2018 | 49.00  | 24.50 | 76.30  | 0.02 | 10.25 | 5.05  | 11.20 | 80.77  | 0.38  | 1.93   | 0.19 |
| 44                | 19/11/2018 | 26/11/2018 | 39.20 | 0.64  | 20/11/2018 | 96.50  | 48.25 | 87.45  | 0.02 | 13.83 | 2.83  | 3.20  | 24.25  | 0.06  | 0.40   | 0.03 |
| 45                | 30/01/2019 | 03/02/2019 | 68.80 | 13.43 | 31/01/2019 | 80.00  | 40.00 | 108.80 | 0.21 | 16.70 | 3.87  | 19.60 | 176.30 | 2.67  | 36.65  | 1.33 |
| 46                | 02/11/2019 | 07/11/2019 | 62.80 | 1.85  | 29/10/2019 | 51.50  | 25.75 | 93.35  | 0.03 | 35.20 | 1.92  | 18.40 | 130.45 | 0.33  | 3.57   | 0.17 |
| 47                | 08/11/2019 | 12/11/2019 | 31.60 | 2.05  | 04/11/2019 | 93.50  | 46.75 | 78.35  | 0.06 | 8.17  | 3.87  | 12.40 | 38.05  | 1.04  | 2.47   | 0.52 |
| <i>Mean Value</i> |            |            | 30.38 | 2.15  | -          | 50.94  | 25.47 | 55.95  | 0.04 | 6.94  | 6.26  | 14.17 | 88.39  | 1.18  | 12.34  | 0.97 |
| <i>Max. Value</i> |            |            | 87.40 | 15.45 | -          | 100.00 | 50.00 | 108.80 | 0.31 | 35.20 | 34.73 | 54.00 | 762.60 | 17.76 | 203.84 | 8.84 |
| <i>Min. Value</i> |            |            | 5.20  | 0.00  | -          | 1.00   | 0.50  | 9.85   | 0.00 | 0.17  | 1.92  | 2.00  | 1.40   | 0.00  | 0.00   | 0.01 |

**Notes and Caption:**

\* rill event.

\*\* missing value.

- not calculated value.

**P**; cumulated event rainfall depth (SERLAB, 42°59'34"N 12°17'27"E)

**Q**; event runoff expressed (SERLAB, 42°59'34"N 12°17'27"E)

**SSM(t)**; surface soil moisture derived by satellite observation (Sentinel1)

**ADSI**; antecedent degree of saturation index (equation 6)

**Q<sub>R</sub>**; runoff coefficient computed as the ratio between P and Q (P/Q).

**W**; rainfall wet duration

**I<sub>M</sub>**; mean intensity computed as the ratio between P and W (P/W).

**I<sub>30</sub>**; maximum 30-min rainfall intensity observed during the event

**R<sub>e</sub>**; erosivity factor of the single event.

**A<sub>e</sub>**; measured event soil loss (SERLAB, 42°59'34"N 12°17'27"E)

**A<sub>e,N</sub>**; normalised event soil loss according to plot characteristics
